# Supplementary material
Source: Royal Society of Chemistry journal article supplement (doi:10.1039/d6tc00796a)
Supplement: d6tc00796a1.pdf [file d6tc00796a1.pdf]

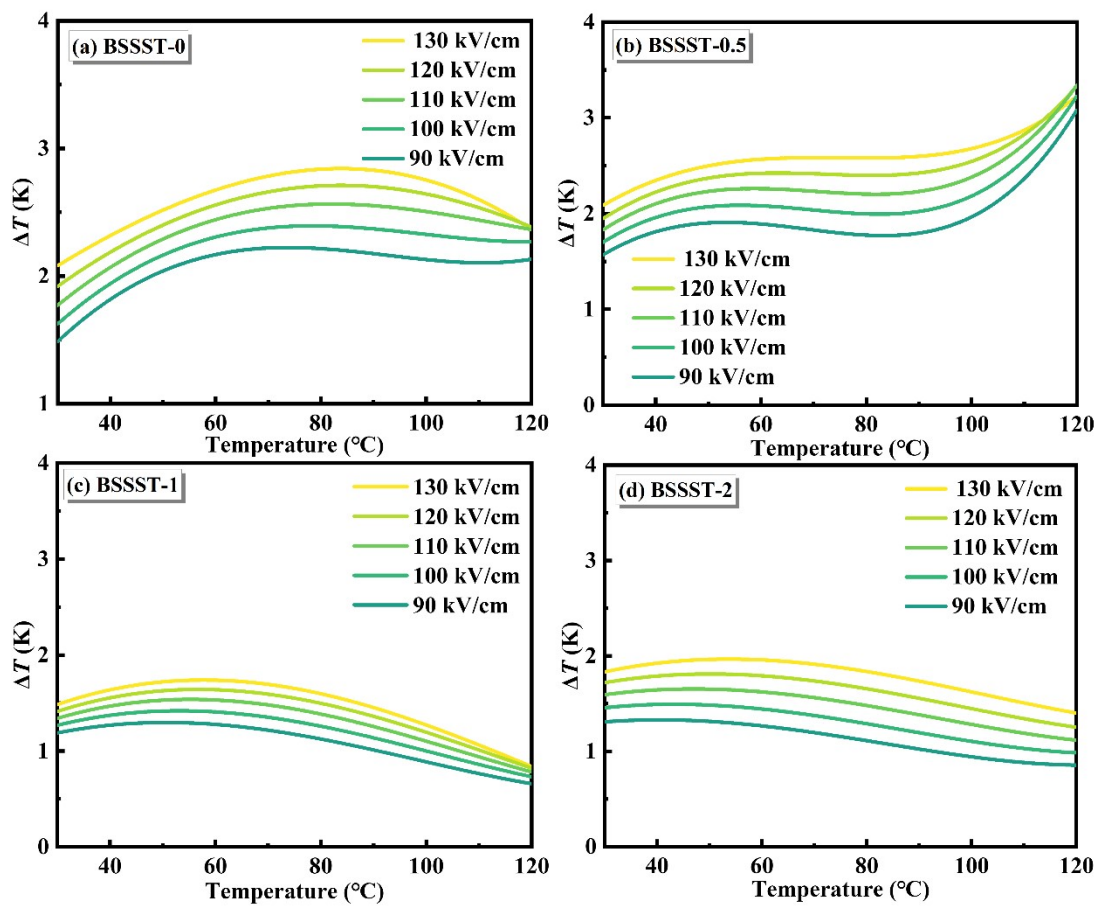

**Fig S1.** (a-d) Under the same electric field conditions, the relationship graph between  $\Delta T$  and temperature for ceramic materials with x values of 0, 0.005, 0.01 and 0.02.
